# Supplementary material
Source: PubMed Central journal article supplement (PMC5866240)
Supplement: NIHMS942420-supplement.pdf [file NIHMS942420-supplement.pdf]

## Supplemental Items

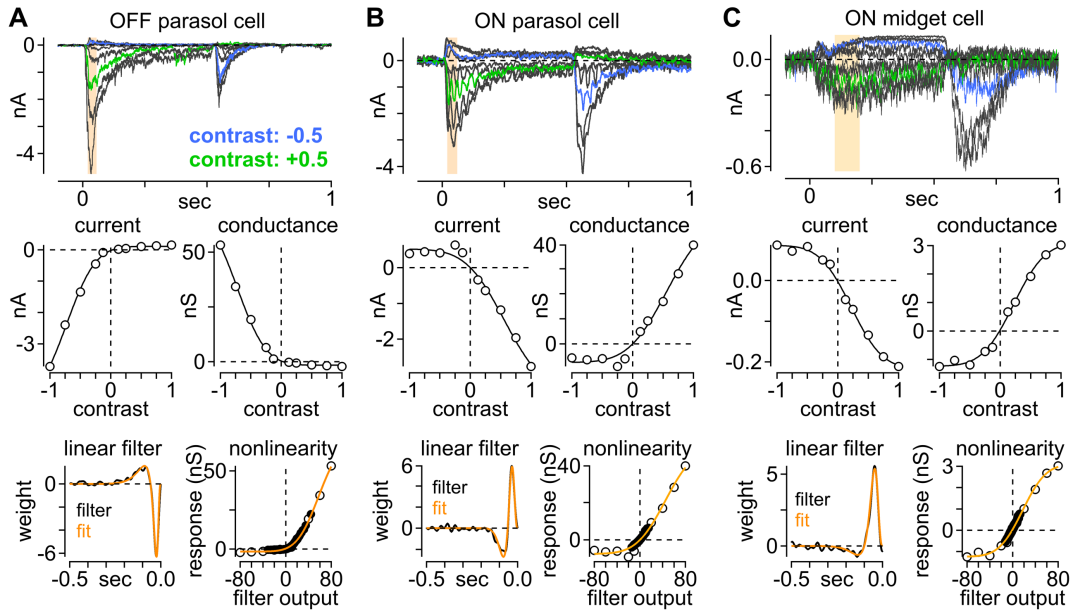

**Figure S1. Determining the complete excitatory output nonlinearity**, Related to Figure 7, STAR Methods. (A) Excitatory currents in an OFF parasol cell recorded to 0.5 sec contrast steps (*top*). Average excitatory current (*middle left*) and conductance (*middle right*) as a function of contrast for responses following step onset indicated by shaded region (*orange, top*). (*Bottom*) Linear filter (*left*) and full output nonlinearity (*right*) for the same cell. (B-C) Same as (A) for an ON parasol and ON midget ganglion cell.
